# Supplementary material
Source: ML conference proceedings conference paper supplement (https://proceedings.neurips.cc/paper_files/paper/2023/hash/525c95ffca1f57a10e3527d3584f3cf1-Abstract.html)
Supplement: Supplementary file 1 [file 525c95ffca1f57a10e3527d3584f3cf1-Supplemental-Conference.pdf]

---

# Robustifying Generalizable Implicit Shape Networks with a Tunable Non-Parametric Model – Supplementary Material –

---

Amine Ouasfi      Adnane Boukhayma  
Inria, Univ. Rennes, CNRS, IRISA, M2S, France

## Quantitative comparison to SPSR [3] in ShapeNet [2]

Table 1: Comparison to PCA normals + SPSR.

|      | IoU $\uparrow$ | CD <sub>1</sub> $\downarrow$ | NC $\uparrow$ | FS $\uparrow$ |
|------|----------------|------------------------------|---------------|---------------|
| SPSR | 0.65           | 1.28                         | 0.84          | 0.74          |
| Ours | <b>0.90</b>    | <b>0.35</b>                  | <b>0.95</b>   | <b>0.98</b>   |

Table 1 shows a numerical comparison to Screened Poisson Surface Reconstruction (SPSR) [3] on classes Tables, Lamps and Chairs of ShapeNet [2]. Input point clouds are of size 10k with 0.005 standard deviation Gaussian noise. We remind that our method builds on Poco [1].

## Additional Qualitative Results for ShapeNet [2] Reconstructions

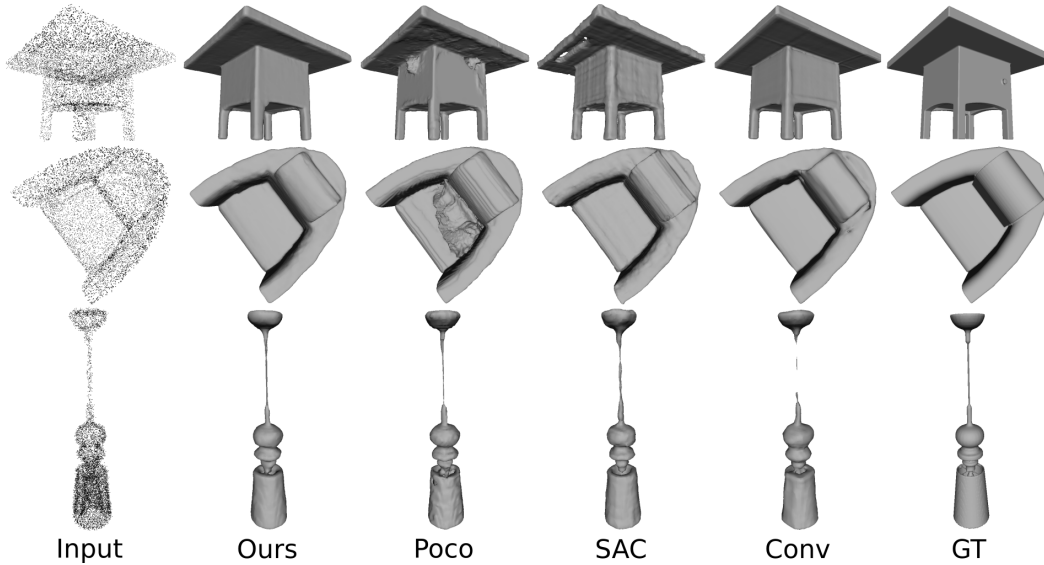

Figure 1: Additional qualitative comparison of ShapeNet reconstructions.

Figure 1 shows additional reconstruction examples from our method, Poco [1], SAC [6] and Conv [5]. Input point clouds are of size 10k with 0.005 standard deviation Gaussian noise. While test-time finetuning (SAC) can improve on its baseline (Conv), it can also lead to worse final reconstructions. Notice how our approach can reliably improve on its baseline (Poco).

## Recovering from baseline failures

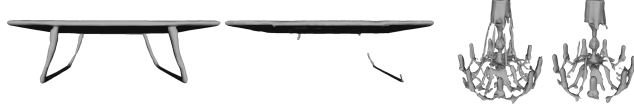

Figure 2: Comparison to our baseline in ShapeNet [2]. **Ours / Baseline.**

Figure 2 shows cases where we can recover from failures of our baseline (Poco [1]). Input point clouds are of size 10k plus a 0.005 standard deviation Gaussian noise. We improve **chamfer error** from **0.85 (baseline)** to **0.27 (Ours)** for the table example on the left, and from **1.22 (baseline)** to **0.86 (Ours)** for the chandelier on the right. As part of our limitations, and despite improving on the reconstruction of the network baseline, it is still challenging for our method to recover the finest structures and intricate details of a complex shape such as the chandelier example.

## Evaluation Metrics

Following the definitions from [1], we present here the formal definitions for the metrics that we use for evaluation in the main submission. We denote by  $\mathcal{S}$  and  $\hat{\mathcal{S}}$  the ground truth and predicted mesh respectively. All metrics are approximated with 100k samples from  $\mathcal{S}$  and  $\hat{\mathcal{S}}$ .

**Intersection over Union (IoU)** The volumetric Intersection over Union is the ratio of the intersection of the inside volumes of the meshes to their union:

$$\text{IoU} = \frac{|\{x \in \Omega : x \text{ inside } \mathcal{S} \text{ and } \hat{\mathcal{S}}\}|}{|\{x \in \Omega : x \text{ inside } \mathcal{S} \text{ or } \hat{\mathcal{S}}\}|},$$

where  $|\cdot|$  represents the sets cardinality, which is approximately determined by sampling 100k points from the bounding volume  $\Omega$  of  $\mathcal{S}$ .

**Chamfer Distance (CD<sub>1</sub>)** The L<sub>1</sub> Chamfer distance is based on the two-ways nearest neighbor distance:

$$\text{CD}_1 = \frac{1}{2|\mathcal{S}|} \sum_{v \in \mathcal{S}} \min_{\hat{v} \in \hat{\mathcal{S}}} \|v - \hat{v}\|_2 + \frac{1}{2|\hat{\mathcal{S}}|} \sum_{\hat{v} \in \hat{\mathcal{S}}} \min_{v \in \mathcal{S}} \|\hat{v} - v\|_2.$$

**F-Score (FS)** For a given threshold  $\tau$ , the F-score between the meshes  $\mathcal{S}$  and  $\hat{\mathcal{S}}$  is defined as:

$$\text{FS}(\tau, \mathcal{S}, \hat{\mathcal{S}}) = \frac{2 \text{ Recall} \cdot \text{Precision}}{\text{Recall} + \text{Precision}},$$

where

$$\begin{aligned} \text{Recall}(\tau, \mathcal{S}, \hat{\mathcal{S}}) &= |\{v \in \mathcal{S}, \text{ s.t. } \min_{\hat{v} \in \hat{\mathcal{S}}} \|v - \hat{v}\|_2 \leq \tau\}|, \\ \text{Precision}(\tau, \mathcal{S}, \hat{\mathcal{S}}) &= |\{\hat{v} \in \hat{\mathcal{S}}, \text{ s.t. } \min_{v \in \mathcal{S}} \|\hat{v} - v\|_2 \leq \tau\}|. \end{aligned}$$

Following [4] and [5], we set  $\tau$  to 0.01.

**Normal consistency (NC)** We denote here by  $n_v$  the normal at a point  $v$  in  $\mathcal{S}$ . The normal consistency between two meshes  $\mathcal{S}$  and  $\hat{\mathcal{S}}$  is defined as:

$$\text{NC} = \frac{1}{2|\mathcal{S}|} \sum_{v \in \mathcal{S}} n_v \cdot n_{\text{closest}(v, \hat{\mathcal{S}})} + \frac{1}{2|\hat{\mathcal{S}}|} \sum_{\hat{v} \in \hat{\mathcal{S}}} n_{\hat{v}} \cdot n_{\text{closest}(\hat{v}, \mathcal{S})},$$

where

$$\text{closest}(v, \hat{\mathcal{S}}) = \operatorname{argmin}_{\hat{v} \in \hat{\mathcal{S}}} \|v - \hat{v}\|_2.$$

## References

- [1] Alexandre Boulch and Renaud Marlet. Poco: Point convolution for surface reconstruction. In *Proceedings of the IEEE/CVF Conference on Computer Vision and Pattern Recognition*, pages 6302–6314, 2022. 1, 2
- [2] Angel X Chang, Thomas Funkhouser, Leonidas Guibas, Pat Hanrahan, Qixing Huang, Zimo Li, Silvio Savarese, Manolis Savva, Shuran Song, Hao Su, et al. Shapenet: An information-rich 3d model repository. *arXiv preprint arXiv:1512.03012*, 2015. 1, 2
- [3] Michael Kazhdan and Hugues Hoppe. Screened poisson surface reconstruction. *TOG*, 2013. 1
- [4] Lars Mescheder, Michael Oechsle, Michael Niemeyer, Sebastian Nowozin, and Andreas Geiger. Occupancy networks: Learning 3d reconstruction in function space. In *Proceedings of the IEEE/CVF conference on computer vision and pattern recognition*, pages 4460–4470, 2019. 2
- [5] Songyou Peng, Michael Niemeyer, Lars Mescheder, Marc Pollefeys, and Andreas Geiger. Convolutional occupancy networks. In *European Conference on Computer Vision*, pages 523–540. Springer, 2020. 2
- [6] Jiapeng Tang, Jiabao Lei, Dan Xu, Feiying Ma, Kui Jia, and Lei Zhang. Sa-convonet: Sign-agnostic optimization of convolutional occupancy networks. In *Proceedings of the IEEE/CVF International Conference on Computer Vision*, pages 6504–6513, 2021. 2
